# Supplementary material for: Association of Bisphenol A and Its Substitutes, Bisphenol F and Bisphenol S, with Obesity in United States Children and Adolescents
Source: PubMed Central journal article supplement — Diabetes Metab J. 2019 Feb 19;43(1):59–75. doi: 10.4093/dmj.2018.0045 (PMC6387872; doi:10.4093/dmj.2018.0045), 2019-02-19
Supplement: dmj-43-59-s001.pdf [file dmj-43-59-s001.pdf]

**Supplementary Table 1.** Characteristics of population according to quartiles of urinary bisphenol A concentrations, National Health and Nutrition Examination Survey 2013 to 2014 ( $n=745$ )

| Characteristic                    | Quartile 1<br>( $<0.7$ ng/mL) | Quartile 2<br>( $0.7$ – $1.3$ ng/mL) | Quartile 3<br>( $1.3$ – $2.5$ ng/mL) | Quartile 4<br>( $>2.5$ ng/mL) | <i>P</i> value |
|-----------------------------------|-------------------------------|--------------------------------------|--------------------------------------|-------------------------------|----------------|
| No. of participants               | 196                           | 194                                  | 173                                  | 182                           |                |
| Age, yr                           | 11.6 $\pm$ 0.3                | 11.7 $\pm$ 0.3                       | 11.4 $\pm$ 0.3                       | 10.6 $\pm$ 0.4                | 0.54           |
| Sex, %                            |                               |                                      |                                      |                               | 0.78           |
| Boys                              | 50.4 (3.6)                    | 48.3 (3.2)                           | 54.0 (4.6)                           | 50.5 (5.3)                    |                |
| Girls                             | 49.6 (3.6)                    | 51.7 (3.2)                           | 46.0 (4.6)                           | 49.5 (5.3)                    |                |
| Race/ethnicity, %                 |                               |                                      |                                      |                               | 0.06           |
| Hispanic                          | 25.8 (5.3)                    | 28.6 (5.2)                           | 18.5 (4.4)                           | 23.6 (6.5)                    |                |
| Non-Hispanic white                | 55.9 (7.0)                    | 47.0 (6.2)                           | 56.1 (7.3)                           | 47.5 (7.1)                    |                |
| Non-Hispanic black                | 7.2 (1.9)                     | 13.4 (3.3)                           | 15.8 (2.9)                           | 22.5 (4.5)                    |                |
| Other                             | 11.1 (2.7)                    | 11.0 (1.9)                           | 9.5 (2.7)                            | 6.3 (2.1)                     |                |
| Family income to poverty ratio, % |                               |                                      |                                      |                               | 0.37           |
| $\leq 1.30$                       | 29.0 (7.5)                    | 39.2 (4.7)                           | 36.7 (5.3)                           | 37.7 (5.2)                    |                |
| 1.31–3.50                         | 28.0 (3.6)                    | 28.3 (4.1)                           | 33.0 (4.9)                           | 34.2 (4.2)                    |                |
| $>3.50$                           | 30.2 (7.5)                    | 27.3 (6.7)                           | 27.1 (6.8)                           | 22.3 (5.5)                    |                |
| Missing                           | 11.0 (2.9)                    | 5.2 (2.1)                            | 3.1 (1.1)                            | 5.8 (1.4)                     |                |
| Total calories, kcal/day          | 1,941.9 $\pm$ 72.0            | 2,153.8 $\pm$ 117.1                  | 1,901.9 $\pm$ 62.5                   | 1,892.8 $\pm$ 67.5            | 0.16           |
| HEI-2010 score                    | 45.5 $\pm$ 1.1                | 45.6 $\pm$ 1.6                       | 47.0 $\pm$ 1.3                       | 46.9 $\pm$ 1.5                | 0.93           |
| TV watching, %                    |                               |                                      |                                      |                               | 0.21           |
| $<2$ hr                           | 31.1 (4.7)                    | 42.2 (4.4)                           | 42.8 (4.6)                           | 42.0 (4.4)                    |                |
| $\geq 2$ hr                       | 68.9 (4.7)                    | 57.8 (4.4)                           | 57.2 (4.6)                           | 58.0 (4.4)                    |                |
| General obesity, %                |                               |                                      |                                      |                               | 0.49           |
| Yes                               | 17.0 (3.6)                    | 21.1 (4.1)                           | 24.6 (4.7)                           | 22.2 (3.6)                    |                |
| No                                | 83.0 (3.6)                    | 78.9 (4.1)                           | 74.4 (4.7)                           | 77.8 (3.6)                    |                |
| Abdominal obesity, %              |                               |                                      |                                      |                               | 0.60           |
| Yes                               | 36.2 (4.2)                    | 30.2 (5.3)                           | 35.7 (5.7)                           | 38.1 (4.2)                    |                |
| No                                | 63.8 (4.2)                    | 69.8 (5.3)                           | 64.3 (5.7)                           | 61.9 (4.2)                    |                |

Values are presented as weighted mean  $\pm$  standard error (SE) for continuous variables and weighted percentages (SE) for categorical variables except number of participants.

HEI, Healthy Eating Index.
