# Supplementary material for: Association of Bisphenol A and Its Substitutes, Bisphenol F and Bisphenol S, with Obesity in United States Children and Adolescents
Source: PubMed Central journal article supplement — Diabetes Metab J. 2019 Feb 19;43(1):59–75. doi: 10.4093/dmj.2018.0045 (PMC6387872; doi:10.4093/dmj.2018.0045), 2019-02-19
Supplement: dmj-43-59-s002.pdf [file dmj-43-59-s002.pdf]

**Supplementary Table 2.** Characteristics of population according to quartiles of urinary bisphenol S concentrations, National Health and Nutrition Examination Survey 2013 to 2014 ( $n=745$ )

| Characteristic                    | Quartile 1<br>( $<0.2$ ng/mL) | Quartile 2<br>( $0.2-0.4$ ng/mL) | Quartile 3<br>( $0.4-0.7$ ng/mL) | Quartile 4<br>( $> 0.7$ ng/mL) | P value |
|-----------------------------------|-------------------------------|----------------------------------|----------------------------------|--------------------------------|---------|
| No. of participants               | 156                           | 209                              | 197                              | 183                            |         |
| Age, yr                           | 11.2 $\pm$ 0.3                | 11.3 $\pm$ 0.3                   | 11.5 $\pm$ 0.3                   | 11.4 $\pm$ 0.4                 | 0.73    |
| Sex, %                            |                               |                                  |                                  |                                | 0.62    |
| Boys                              | 55.2 (3.6)                    | 50.8 (5.5)                       | 51.3 (5.3)                       | 46.0 (3.8)                     |         |
| Girls                             | 44.8 (3.6)                    | 49.2 (5.5)                       | 48.7 (5.3)                       | 54.0 (3.8)                     |         |
| Race/ethnicity, %                 |                               |                                  |                                  |                                | 0.03    |
| Hispanic                          | 23.2 (6.6)                    | 17.8 (4.4)                       | 25.3 (4.7)                       | 32.9 (5.4)                     |         |
| Non-Hispanic white                | 57.1 (7.1)                    | 60.5 (7.1)                       | 45.3 (6.7)                       | 42.0 (6.4)                     |         |
| Non-Hispanic black                | 8.9 (3.2)                     | 13.1 (3.2)                       | 19.6 (3.5)                       | 15.4 (2.3)                     |         |
| Other                             | 10.8 (2.0)                    | 8.7 (2.4)                        | 9.8 (3.0)                        | 9.6 (2.0)                      |         |
| Family income to poverty ratio, % |                               |                                  |                                  |                                | 0.51    |
| $\leq 1.30$                       | 41.1 (8.1)                    | 27.8 (2.0)                       | 38.8 (5.7)                       | 36.8 (4.6)                     |         |
| 1.31–3.50                         | 30.8 (7.1)                    | 34.1 (4.2)                       | 27.6 (4.9)                       | 31.3 (4.9)                     |         |
| $> 3.50$                          | 23.8 (5.2)                    | 31.7 (5.8)                       | 27.1 (5.0)                       | 23.3 (5.2)                     |         |
| Missing                           | 4.2 (1.5)                     | 6.4 (2.0)                        | 6.6 (2.5)                        | 8.7 (1.9)                      |         |
| Total calories, kcal/day          | 1,968.6 $\pm$ 68.5            | 1,873.0 $\pm$ 71.0               | 2,057.8 $\pm$ 99.7               | 2,035.1 $\pm$ 116.4            | 0.36    |
| HEI-2010 score                    | 44.9 $\pm$ 1.2                | 46.5 $\pm$ 1.5                   | 47.6 $\pm$ 1.7                   | 45.5 $\pm$ 1.6                 | 0.14    |
| TV watching, %                    |                               |                                  |                                  |                                | 0.88    |
| $< 2$ hr                          | 36.1 (5.4)                    | 40.7 (3.3)                       | 39.7 (4.6)                       | 38.9 (4.3)                     |         |
| $\geq 2$ hr                       | 63.9 (5.4)                    | 59.3 (3.3)                       | 60.3 (4.6)                       | 61.1 (4.3)                     |         |
| General obesity, %                |                               |                                  |                                  |                                | 0.79    |
| Yes                               | 18.8 (4.8)                    | 20.5 (3.8)                       | 20.4 (3.2)                       | 24.2 (5.5)                     |         |
| No                                | 81.2 (4.8)                    | 79.5 (3.8)                       | 79.6 (3.2)                       | 75.8 (5.5)                     |         |
| Abdominal obesity, %              |                               |                                  |                                  |                                | 0.61    |
| Yes                               | 37.8 (4.8)                    | 32.2 (3.4)                       | 33.2 (4.6)                       | 38.4 (6.9)                     |         |
| No                                | 62.2 (4.8)                    | 67.8 (3.4)                       | 66.8 (4.6)                       | 61.6 (6.9)                     |         |

Values are presented as weighted mean  $\pm$  standard error (SE) for continuous variables and weighted percentages (SE) for categorical variables except number of participants.

HEI, Healthy Eating Index.
