# Supplementary material for: Association of Bisphenol A and Its Substitutes, Bisphenol F and Bisphenol S, with Obesity in United States Children and Adolescents
Source: PubMed Central journal article supplement — Diabetes Metab J. 2019 Feb 19;43(1):59–75. doi: 10.4093/dmj.2018.0045 (PMC6387872; doi:10.4093/dmj.2018.0045), 2019-02-19
Supplement: dmj-43-59-s003.pdf [file dmj-43-59-s003.pdf]

**Supplementary Table 3.** Characteristics of population according to quartiles of urinary bisphenol F concentrations, National Health and Nutrition Examination Survey 2013 to 2014 ( $n=745$ )

| Characteristic                    | Quartile 1<br>( $<0.14$ ng/mL) | Quartile 2<br>( $0.14$ – $0.3$ ng/mL) | Quartile 3<br>( $0.3$ – $0.9$ ng/mL) | Quartile 4<br>( $>0.9$ ng/mL) | P value |
|-----------------------------------|--------------------------------|---------------------------------------|--------------------------------------|-------------------------------|---------|
| No. of participants               | 289                            | 106                                   | 160                                  | 190                           |         |
| Age, yr                           | $11.1 \pm 0.2$                 | $10.9 \pm 0.4$                        | $11.6 \pm 0.3$                       | $11.8 \pm 0.4$                | 0.65    |
| Sex, %                            |                                |                                       |                                      |                               | 0.20    |
| Boys                              | 56.0 (2.2)                     | 48.6 (5.0)                            | 44.1 (3.9)                           | 50.3 (5.7)                    |         |
| Girls                             | 44.0 (2.2)                     | 51.4 (5.0)                            | 55.9 (3.9)                           | 49.7 (5.7)                    |         |
| Race/ethnicity, %                 |                                |                                       |                                      |                               | 0.01    |
| Hispanic                          | 27.9 (4.7)                     | 27.7 (6.4)                            | 25.9 (6.1)                           | 16.8 (3.8)                    |         |
| Non-Hispanic white                | 44.8 (6.7)                     | 47.2 (7.5)                            | 52.8 (7.0)                           | 62.2 (5.2)                    |         |
| Non-Hispanic black                | 13.6 (2.9)                     | 12.6 (3.1)                            | 16.4 (3.0)                           | 14.4 (3.2)                    |         |
| Other                             | 13.6 (3.0)                     | 12.5 (3.9)                            | 5.0 (1.3)                            | 6.7 (1.8)                     |         |
| Family income to poverty ratio, % |                                |                                       |                                      |                               | 0.18    |
| $\leq 1.30$                       | 39.2 (5.4)                     | 41.1 (8.0)                            | 35.4 (6.9)                           | 27.7 (4.9)                    |         |
| 1.31–3.50                         | 31.7 (3.8)                     | 36.7 (6.5)                            | 24.7 (4.0)                           | 32.9 (5.6)                    |         |
| $> 3.50$                          | 21.0 (4.3)                     | 17.2 (5.1)                            | 33.4 (8.0)                           | 34.2 (4.9)                    |         |
| Missing                           | 8.1 (2.2)                      | 5.0 (2.6)                             | 6.5 (2.3)                            | 5.3 (2.4)                     |         |
| Total calories, kcal/day          | $2,002.6 \pm 46.5$             | $1,972.3 \pm 158.5$                   | $2,050.3 \pm 132.7$                  | $1,881.1 \pm 75.3$            | 0.87    |
| HEI-2010 score                    | $45.8 \pm 1.3$                 | $43.8 \pm 2.1$                        | $49.3 \pm 1.5$                       | $45.4 \pm 1.2$                | 0.82    |
| TV watching, %                    |                                |                                       |                                      |                               | 0.51    |
| $< 2$ hr                          | 35.4 (3.6)                     | 40.3 (6.6)                            | 39.2 (3.1)                           | 43.1 (4.1)                    |         |
| $\geq 2$ hr                       | 64.6 (3.6)                     | 59.7 (6.6)                            | 60.8 (3.1)                           | 56.9 (4.1)                    |         |
| General obesity, %                |                                |                                       |                                      |                               | 0.43    |
| Yes                               | 18.3 (2.4)                     | 25.8 (3.6)                            | 21.3 (5.0)                           | 21.8 (3.9)                    |         |
| No                                | 81.7 (2.4)                     | 74.2 (3.6)                            | 78.7 (5.0)                           | 78.2 (3.9)                    |         |
| Abdominal obesity, %              |                                |                                       |                                      |                               | 0.37    |
| Yes                               | 33.4 (3.9)                     | 41.5 (5.1)                            | 30.2 (7.2)                           | 37.7 (3.6)                    |         |
| No                                | 66.6 (3.9)                     | 58.5 (5.1)                            | 69.8 (7.2)                           | 62.3 (3.6)                    |         |

Values are presented as weighted mean  $\pm$  standard error (SE) for continuous variables and weighted percentages (SE) for categorical variables except number of participants.

HEI, Healthy Eating Index.
