# Supplementary material for: Association of Bisphenol A and Its Substitutes, Bisphenol F and Bisphenol S, with Obesity in United States Children and Adolescents
Source: PubMed Central journal article supplement — Diabetes Metab J. 2019 Feb 19;43(1):59–75. doi: 10.4093/dmj.2018.0045 (PMC6387872; doi:10.4093/dmj.2018.0045), 2019-02-19
Supplement: dmj-43-59-s004.pdf [file dmj-43-59-s004.pdf]

**Supplementary Table 4.** Urinary concentrations of BPA, BPF, and BPS according to population characteristics

| Variable                       | No. | BPA (ng/mL)      |                | BPF (ng/mL)      |                | BPS (ng/mL)      |                |
|--------------------------------|-----|------------------|----------------|------------------|----------------|------------------|----------------|
|                                |     | Median (IQR)     | <i>P</i> value | Median (IQR)     | <i>P</i> value | Median (IQR)     | <i>P</i> value |
| Total                          | 745 | 1.23 (0.63–2.36) |                | 0.30 (0.14–0.93) |                | 0.28 (0.12–0.66) |                |
| Sex                            |     |                  | 0.83           |                  | 0.20           |                  | 0.39           |
| Men                            | 371 | 1.25 (0.63–2.37) |                | 0.26 (0.14–0.94) |                | 0.27 (0.11–0.59) |                |
| Women                          | 374 | 1.22 (0.63–2.25) |                | 0.34 (0.02–0.18) |                | 0.29 (0.13–0.70) |                |
| Race/ethnicity                 |     |                  | 0.17           |                  | 0.26           |                  | 0.19           |
| Hispanic                       | 253 | 1.10 (0.61–2.27) |                | 0.23 (0.14–0.59) |                | 0.38 (0.14–0.94) |                |
| Non-Hispanic white             | 190 | 1.24 (0.59–2.14) |                | 0.39 (0.14–1.17) |                | 0.22 (0.11–0.56) |                |
| Non-Hispanic black             | 191 | 1.80 (0.99–3.09) |                | 0.36 (0.14–0.93) |                | 0.36 (0.17–0.11) |                |
| Other                          | 111 | 1.04 (0.58–2.08) |                | 0.14 (0.14–0.43) |                | 0.28 (0.11–0.66) |                |
| Family income to poverty ratio |     |                  | 0.33           |                  | 0.36           |                  | 0.37           |
| ≤1.30                          | 350 | 1.29 (0.74–2.46) |                | 0.23 (0.14–0.72) |                | 0.30 (0.10–0.68) |                |
| 1.31–3.49                      | 203 | 1.32 (0.64–2.51) |                | 0.26 (0.14–0.97) |                | 0.24 (0.12–0.61) |                |
| >3.50                          | 135 | 1.10 (0.59–2.02) |                | 0.43 (0.14–1.13) |                | 0.26 (0.13–0.60) |                |
| Missing                        | 57  | 0.82 (0.42–1.49) |                | 0.21 (0.14–0.65) |                | 0.41 (0.16–0.93) |                |
| TV watching                    |     |                  | 0.16           |                  | 0.45           |                  | 0.45           |
| <2 hr/day                      | 279 | 1.33 (0.77–2.40) |                | 0.34 (0.14–0.99) |                | 0.28 (0.13–0.63) |                |
| ≥2 hr/day                      | 466 | 1.12 (0.59–2.32) |                | 0.28 (0.14–0.87) |                | 0.27 (0.11–0.66) |                |
| General obesity                |     |                  | 0.59           |                  | 0.53           |                  | 0.39           |
| Yes                            | 165 | 1.34 (0.76–2.45) |                | 0.32 (0.14–1.08) |                | 0.30 (0.13–0.74) |                |
| No                             | 580 | 1.21 (0.60–2.31) |                | 0.30 (0.14–0.90) |                | 0.27 (0.12–0.62) |                |
| Abdominal obesity              |     |                  | 0.64           |                  | 0.72           |                  | 0.58           |
| Yes                            | 262 | 1.28 (0.63–2.55) |                | 0.29 (0.14–1.04) |                | 0.28 (0.11–0.70) |                |
| No                             | 468 | 1.21 (0.63–2.31) |                | 0.30 (0.14–0.86) |                | 0.27 (0.12–0.62) |                |

All the variables were adjusted using population weights for the sample in which BPA concentrations were measured except number (unweighted sample size).

BPA, bisphenol A; BPF, bisphenol F; BPS, bisphenol S; IQR, interquartile range.
