# Supplementary material for: Association of Bisphenol A and Its Substitutes, Bisphenol F and Bisphenol S, with Obesity in United States Children and Adolescents
Source: PubMed Central journal article supplement — Diabetes Metab J. 2019 Feb 19;43(1):59–75. doi: 10.4093/dmj.2018.0045 (PMC6387872; doi:10.4093/dmj.2018.0045), 2019-02-19
Supplement: dmj-43-59-s005.pdf [file dmj-43-59-s005.pdf]

**Supplementary Table 5.** Associations of urinary BPA, BPF, and BPS concentrations with general obesity by age

| Variable | Age group, yr | Quartile 1 | Quartile 2       | Quartile 3       | Quartile 4       | <i>P</i> for trend | <i>P</i> for interaction |
|----------|---------------|------------|------------------|------------------|------------------|--------------------|--------------------------|
| BPA      | 6–11          | 1 (ref)    | 1.57 (0.75–3.29) | 1.06 (0.50–2.25) | 1.45 (0.61–3.43) | 0.52               | 0.33                     |
|          | 12–17         | 1 (ref)    | 1.53 (0.67–3.50) | 2.83 (0.92–8.68) | 1.43 (0.45–4.51) | 0.33               |                          |
| BPF      | 6–11          | 1 (ref)    | 1.06 (0.60–1.89) | 1.10 (0.54–2.25) | 0.80 (0.30–2.13) | 0.66               | 0.56                     |
|          | 12–17         | 1 (ref)    | 2.19 (0.69–6.93) | 2.19 (0.84–5.69) | 2.56 (1.30–5.02) | 0.01               |                          |
| BPS      | 6–11          | 1 (ref)    | 0.99 (0.49–1.97) | 0.89 (0.47–1.70) | 1.42 (0.68–2.94) | 0.44               | 0.79                     |
|          | 12–17         | 1 (ref)    | 1.14 (0.39–3.31) | 1.10 (0.38–3.18) | 0.98 (0.24–4.00) | 0.93               |                          |

Values are presented as odds ratio (95% confidence interval). The number of participants was 409 in 6 to 11 years old age group and 336 in 12 to 17 years old age group. Adjusted for sex (boys, girls), urinary creatinine (quartiles), race/ethnicity (Hispanic, non-Hispanic white, non-Hispanic black, and other race), family income (family income to poverty ratio:  $\leq 1.30$ , 1.31 to 3.50,  $> 3.50$ , or missing), TV watching ( $< 2$  hours/day,  $\geq 2$  hours/day), total energy intake (quartiles), and Healthy Eating Index-2010 score (quartiles).

BPA, bisphenol A; BPF, bisphenol F; BPS, bisphenol S.
