# Supplementary material for: Association of Bisphenol A and Its Substitutes, Bisphenol F and Bisphenol S, with Obesity in United States Children and Adolescents
Source: PubMed Central journal article supplement — Diabetes Metab J. 2019 Feb 19;43(1):59–75. doi: 10.4093/dmj.2018.0045 (PMC6387872; doi:10.4093/dmj.2018.0045), 2019-02-19
Supplement: dmj-43-59-s006.pdf [file dmj-43-59-s006.pdf]

**Supplementary Table 6.** Associations of urinary BPA, BPF, and BPS concentrations with abdominal obesity by age

| Variable | Age group, yr | Quartile 1 | Quartile 2       | Quartile 3       | Quartile 4       | <i>P</i> for trend | <i>P</i> for interaction |
|----------|---------------|------------|------------------|------------------|------------------|--------------------|--------------------------|
| BPA      | 6–11          | 1 (ref)    | 0.99 (0.47–2.08) | 0.90 (0.54–1.50) | 1.15 (0.68–1.95) | 0.41               | 0.22                     |
|          | 12–17         | 1 (ref)    | 0.68 (0.25–1.88) | 1.37 (0.52–3.61) | 1.07 (0.43–2.69) | 0.52               |                          |
| BPF      | 6–11          | 1 (ref)    | 1.03 (0.49–2.19) | 0.81 (0.32–2.04) | 0.83 (0.44–1.58) | 0.56               | 0.35                     |
|          | 12–17         | 1 (ref)    | 2.05 (0.57–7.42) | 1.30 (0.55–3.07) | 2.41 (1.04–5.57) | 0.047              |                          |
| BPS      | 6–11          | 1 (ref)    | 0.91 (0.48–1.71) | 0.91 (0.43–1.93) | 1.26 (0.54–2.94) | 0.58               | 0.25                     |
|          | 12–17         | 1 (ref)    | 0.60 (0.33–1.10) | 0.70 (0.29–1.68) | 0.80 (0.30–2.11) | 0.78               |                          |

Values are presented as odds ratio (95% confidence interval). The number of participants was 403 in 6 to 11 years old age group and 327 in 12 to 17 years old age group. Adjusted for sex (boys, girls), urinary creatinine (quartiles), race/ethnicity (Hispanic, non-Hispanic white, non-Hispanic black, and other race), family income (family income to poverty ratio:  $\leq 1.30$ , 1.31 to 3.50,  $> 3.50$ , or missing), TV watching ( $< 2$  hours/day,  $\geq 2$  hours/day), total energy intake (quartiles), and Healthy Eating Index-2010 score (quartiles).

BPA, bisphenol A; BPF, bisphenol F; BPS, bisphenol S.
