# Supplementary material for: Association of Bisphenol A and Its Substitutes, Bisphenol F and Bisphenol S, with Obesity in United States Children and Adolescents
Source: PubMed Central journal article supplement — Diabetes Metab J. 2019 Feb 19;43(1):59–75. doi: 10.4093/dmj.2018.0045 (PMC6387872; doi:10.4093/dmj.2018.0045), 2019-02-19
Supplement: dmj-43-59-s007.pdf [file dmj-43-59-s007.pdf]

**Supplementary Table 7.** Associations of urinary BPA, BPF, and BPS concentrations with general obesity by race/ethnicity

| Variable | Age group, yr | Quartile 1 | Quartile 2       | Quartile 3        | Quartile 4        | <i>P</i> for trend | <i>P</i> for interaction |
|----------|---------------|------------|------------------|-------------------|-------------------|--------------------|--------------------------|
| BPA      | White         | 1 (ref)    | 2.03 (0.67–6.15) | 5.23 (1.33–20.56) | 4.52 (1.29–15.89) | 0.01               | 0.37                     |
|          | Non-White     | 1 (ref)    | 1.11 (0.59–2.07) | 0.87 (0.43–1.76)  | 0.82 (0.39–1.71)  | 0.44               |                          |
| BPF      | White         | 1 (ref)    | 0.86 (0.22–3.42) | 1.41 (0.36–5.63)  | 1.87 (0.84–4.20)  | 0.11               | 0.33                     |
|          | Non-White     | 1 (ref)    | 2.40 (1.49–3.87) | 1.34 (0.83–2.15)  | 1.18 (0.63–2.22)  | 0.68               |                          |
| BPS      | White         | 1 (ref)    | 1.38 (0.34–5.59) | 0.87 (0.17–4.31)  | 0.51 (0.04–6.96)  | 0.55               | 0.09                     |
|          | Non-White     | 1 (ref)    | 0.98 (0.54–1.77) | 1.31 (0.70–2.43)  | 2.17 (1.17–4.01)  | 0.02               |                          |

Values are presented as odds ratio (95% confidence interval). The number of participants was 190 for Whites and 555 for non-Whites. Adjusted for age (in years), sex (boy, girl), urinary creatinine (quartiles), family income (family income to poverty ratio:  $\leq 1.30$ , 1.31 to 3.50,  $> 3.50$ , or missing), TV watching ( $< 2$  hours/day,  $\geq 2$  hours/day), total energy intake (quartiles), and Healthy Eating Index-2010 score (quartiles). BPA, bisphenol A; BPF, bisphenol F; BPS, bisphenol S.
