# Supplementary material for: Association of Bisphenol A and Its Substitutes, Bisphenol F and Bisphenol S, with Obesity in United States Children and Adolescents
Source: PubMed Central journal article supplement — Diabetes Metab J. 2019 Feb 19;43(1):59–75. doi: 10.4093/dmj.2018.0045 (PMC6387872; doi:10.4093/dmj.2018.0045), 2019-02-19
Supplement: dmj-43-59-s008.pdf [file dmj-43-59-s008.pdf]

**Supplementary Table 8.** Associations of urinary BPA, BPF, and BPS concentrations with abdominal obesity by race/ethnicity

| Variable | Age group, yr | Quartile 1 | Quartile 2       | Quartile 3       | Quartile 4       | <i>P</i> for trend | <i>P</i> for interaction |
|----------|---------------|------------|------------------|------------------|------------------|--------------------|--------------------------|
| BPA      | White         | 1 (ref)    | 0.68 (0.15–3.11) | 1.77 (0.64–4.90) | 2.58 (1.03–6.45) | 0.045              | 0.17                     |
|          | Non-White     | 1 (ref)    | 0.86 (0.59–1.26) | 0.80 (0.50–1.29) | 0.73 (0.39–1.39) | 0.35               |                          |
| BPF      | White         | 1 (ref)    | 0.93 (0.31–2.80) | 0.76 (0.22–2.55) | 1.66 (0.70–3.92) | 0.24               | 0.04                     |
|          | Non-White     | 1 (ref)    | 2.21 (1.40–3.51) | 1.32 (0.86–2.05) | 1.15 (0.64–2.06) | 0.67               |                          |
| BPS      | White         | 1 (ref)    | 0.92 (0.42–2.00) | 0.87 (0.31–2.46) | 0.45 (0.11–1.91) | 0.36               | 0.01                     |
|          | Non-White     | 1 (ref)    | 0.72 (0.42–1.22) | 0.87 (0.47–1.62) | 1.88 (1.07–3.30) | 0.01               |                          |

Values are presented as odds ratio (95% confidence interval). The number of participants was 188 for Whites and 542 for non-Whites. Adjusted for age (in years), sex (boy, girl), urinary creatinine (quartiles), family income (family income to poverty ratio:  $\leq 1.30$ , 1.31 to 3.50,  $> 3.50$ , or missing), TV watching ( $< 2$  hours/day,  $\geq 2$  hours/day), total energy intake (quartiles), and Healthy Eating Index-2010 score (quartiles). BPA, bisphenol A; BPF, bisphenol F; BPS, bisphenol S.
